# Supplementary material for: Discovery of Intratumoral Oncolytic Bacteria Toward Targeted Anticancer Theranostics
Source: PubMed Central journal article supplement (PMC10369285; doi:10.1002/advs.202301679), 2023-05-07
Supplement: ADVS-10-2301679-s001.pdf [file ADVS-10-2301679-s001.pdf]

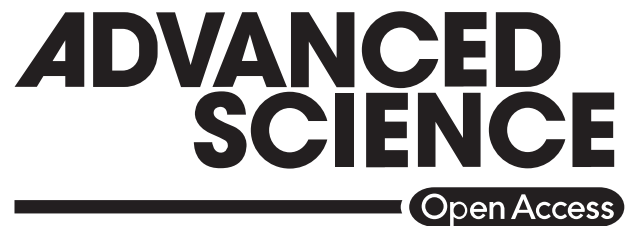

## Supporting Information

for *Adv. Sci.*, DOI 10.1002/adv.202301679

Discovery of Intratumoral Oncolytic Bacteria Toward Targeted Anticancer Theranostics

*Yamato Goto, Seigo Iwata, Mikako Miyahara and Ejiro Miyako\**

## Supporting Information

### **Discovery of Intratumoral Oncolytic Bacteria Toward Targeted Anticancer Theranostics**

*Yamato Goto, Seigo Iwata, Mikako Miyahara, and Eijiro Miyako\**

Graduate School of Advanced Science and Technology, Japan Advanced Institute of Science and Technology, 1-1 Asahidai, Nomi, Ishikawa 923-1292, Japan

\*Corresponding author: E-mail: [e-miyako@jaist.ac.jp](mailto:e-miyako@jaist.ac.jp)

## Supporting Figures & Tables

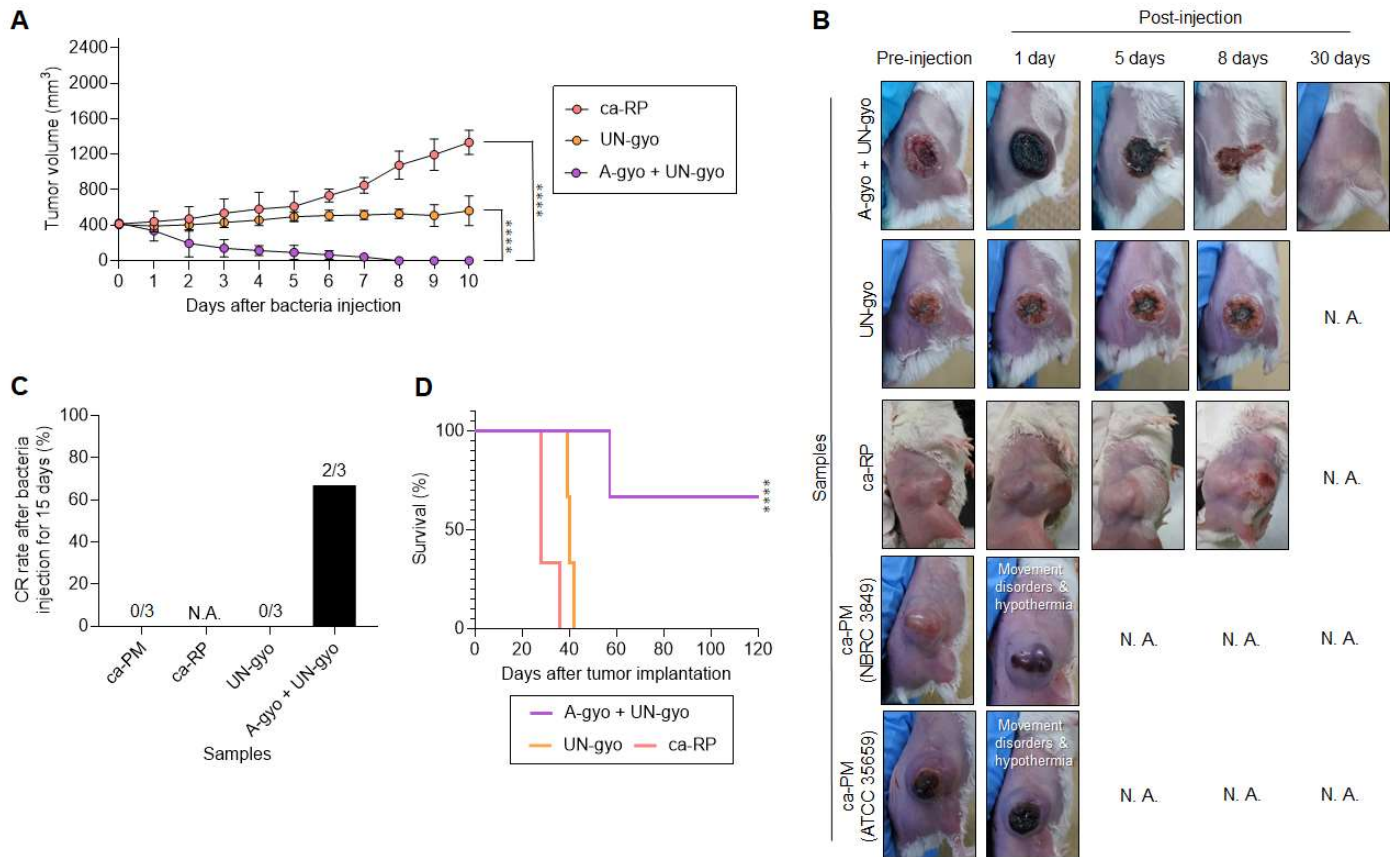

**Figure S1.** Control bacteria-based cancer treatment for Colon-26-tumor-bearing mice. A) *In vivo* anticancer effect of functional bacteria. The suspension of bacteria was intravenously injected into Colon-26-bearing mice. Data are represented as mean  $\pm$  standard errors of the mean (SEM);  $n = 3$  biologically independent mice. \*\*\*\*,  $p < 0.0001$ , by two-way ANOVA test. B) Images of mice after each treatment. N. A., not available. C) Complete response (CR) rate of Colon-26-tumor-bearing mice ( $n = 5$  biologically independent mice) at day 15 after bacteria or PBS injection. D) Kaplan–Meier survival curves of Colon-26-tumor-bearing mice ( $n = 5$  biologically independent mice) after tumor implantation. Statistical significance was calculated by comparison with the PBS group. \*\*\*\*,  $p < 0.0001$ , Log-rank (Mantel-Cox) test.

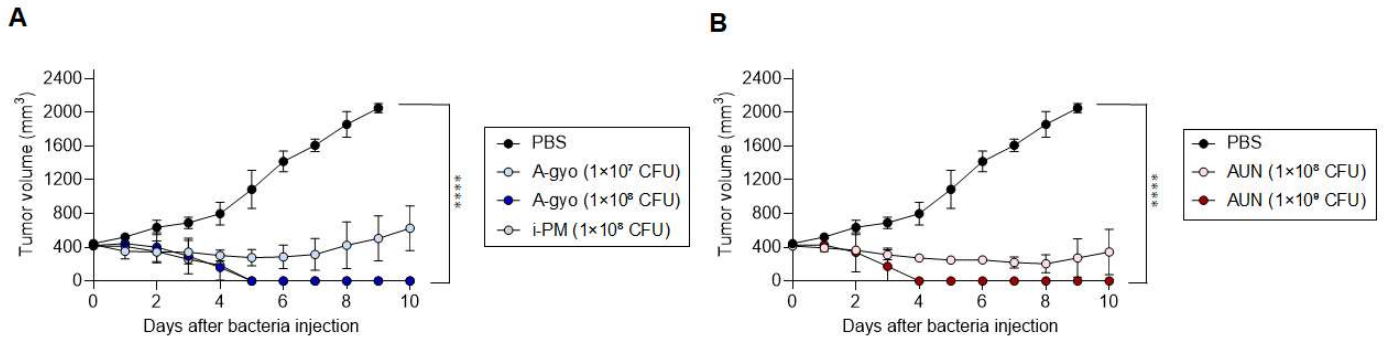

**Figure S2.** Effect of bacterial concentrations on *in vivo* anticancer efficacy. A) *In vivo* Colon-26 anticancer effect of A-gyo at different concentrations ( $1 \times 10^7$  CFU and  $1 \times 10^8$  CFU) and i-PM isolated from solid tumor biopsies without i.v. injection of ca-RP ( $1 \times 10^8$  CFU). Data are represented as mean  $\pm$  standard errors of the mean (SEM);  $n = 3$  (for  $1 \times 10^7$  CFU) or  $n = 5$  (for  $1 \times 10^8$  CFU and PBS) biologically independent mice. \*\*\*\*,  $p < 0.0001$ , by two-way ANOVA test. B) *In vivo* Colon-26 anticancer effect of AUN at different concentrations ( $1 \times 10^8$  CFU and  $1 \times 10^9$  CFU). Data are represented as mean  $\pm$  SEM;  $n = 3$  (for  $1 \times 10^8$  CFU) or  $n = 5$  (for  $1 \times 10^9$  CFU and PBS) biologically independent mice. \*\*\*\*,  $p < 0.0001$ , by two-way ANOVA test.

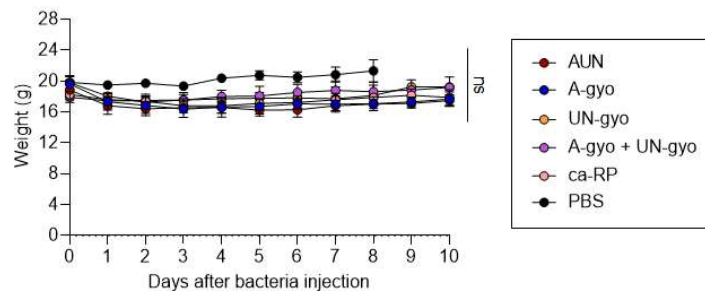

**Figure S3.** Weight measured after various treatments in Colon-26-tumor-bearing mice. Data are represented as mean  $\pm$  SEM;  $n = 5$  (AUN, A-gyo, and PBS) or  $n = 3$  (A-gyo + UN-gyo, UN-gyo, and ca-RP) independent experiments. ns, not significant, by two-way ANOVA test.

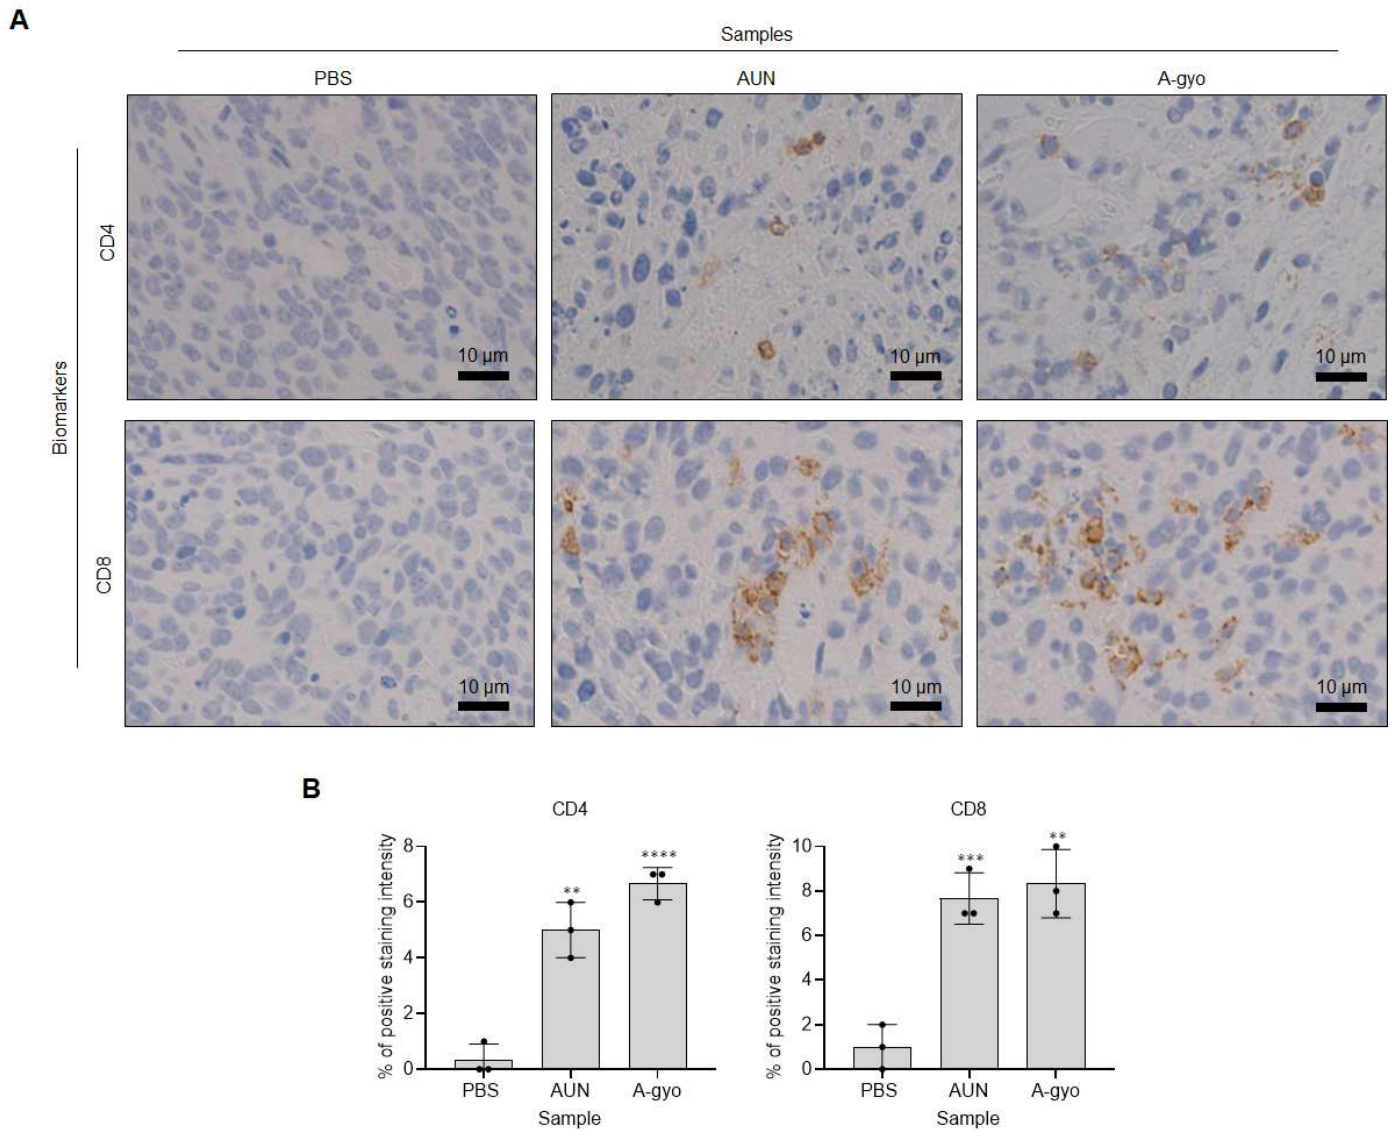

**Figure S4.** A) IHC (CD4 and CD8) stained tumor tissues collected from mice on day 1 after treatment with PBS, AUN, and A-gyo. B) Statistical analyses of IHC (CD4<sup>+</sup> and CD8<sup>+</sup> memory T cells). Data are represented as mean  $\pm$  SEM;  $n = 3$  independent areas (region of interest) in each tumor tissue collected from the groups of mice on day 1 after treatments with A-gyo, AUN, and PBS. Statistical significance was calculated in comparison with the PBS group. \*\*,  $p < 0.01$ , \*\*\*,  $p < 0.001$ , and \*\*\*\*,  $p < 0.0001$ , by Student's  $t$  one-sided test.

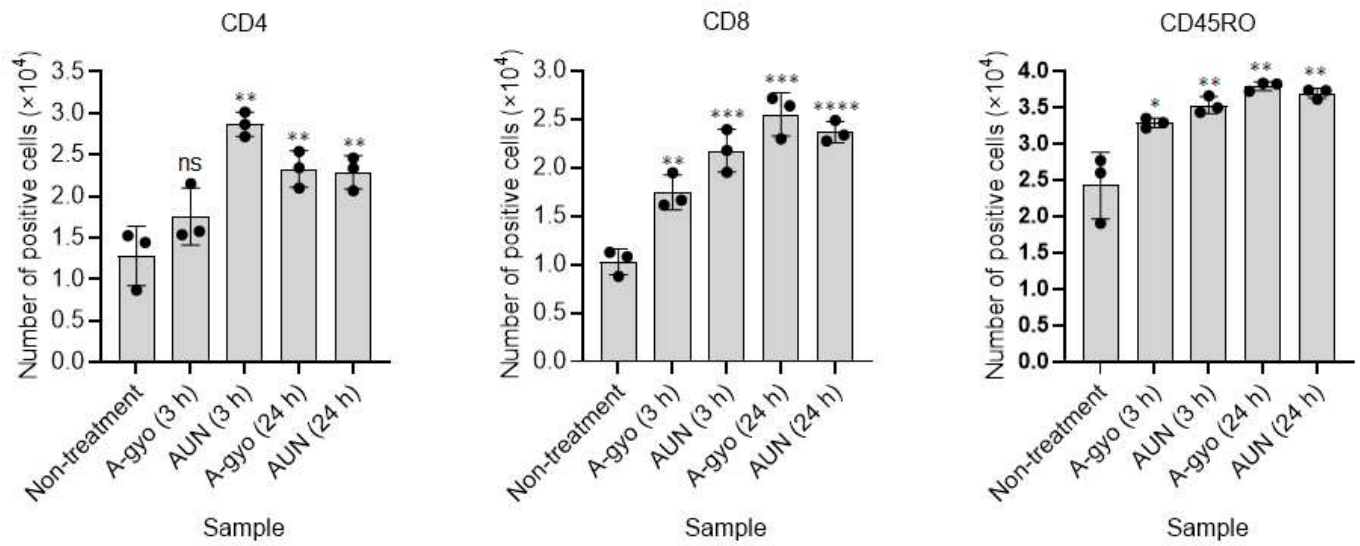

**Figure S5.** Flow cytometry analyses of expression of CD4<sup>+</sup>, CD8<sup>+</sup>, and CD45RO<sup>+</sup> memory T cells in tumors after i.v. injection of each sample for 3 and 24 h. Data are represented as mean  $\pm$  SEM; n = 3 independent tumor tissues. Statistical significance was calculated in comparison with the non-treatment group. ns, not significant, \*,  $p < 0.05$ , \*\*,  $p < 0.01$ , \*\*\*,  $p < 0.001$ , and \*\*\*\*,  $p < 0.0001$ , by Student's *t* one-sided test.



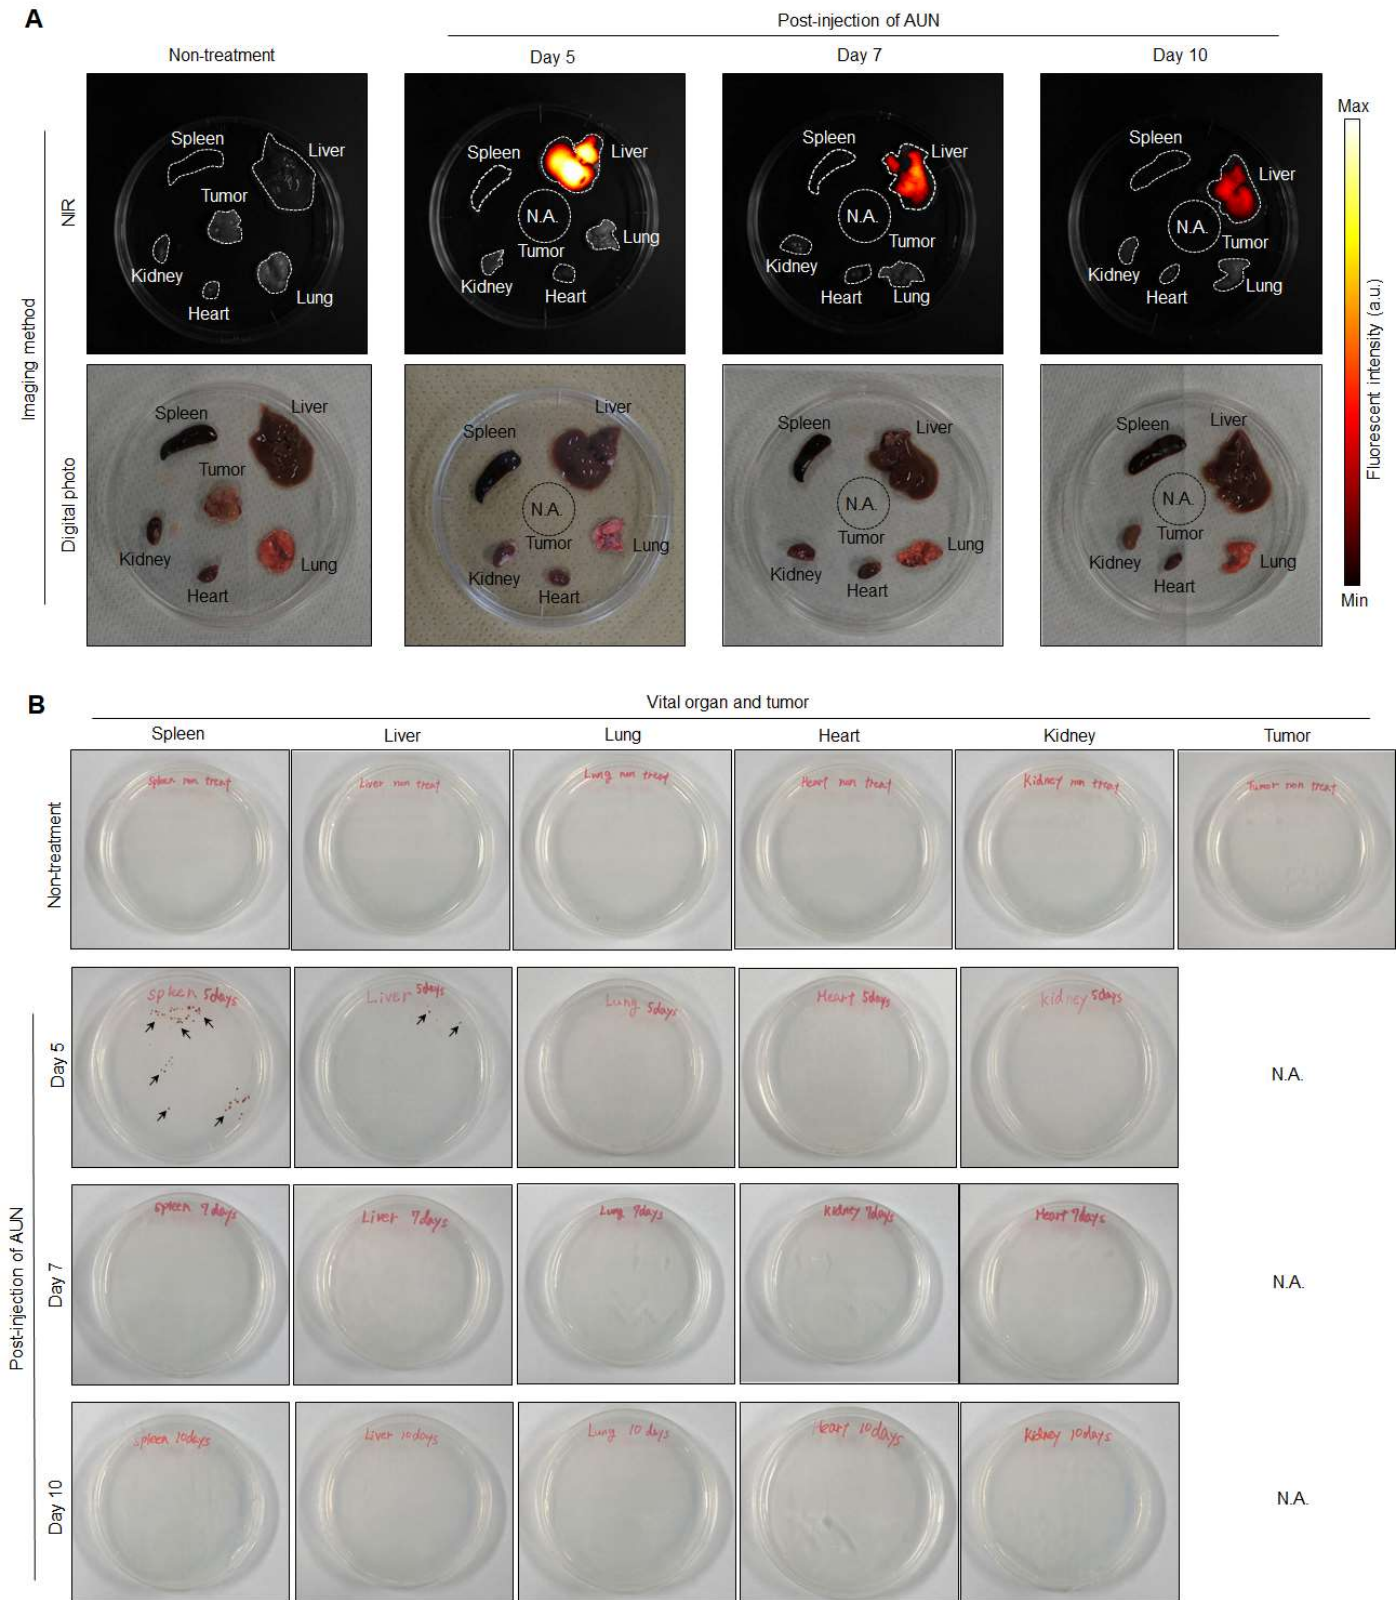

**Figure S6.** A) *Ex vivo* NIR fluorescent biotomaging of vital organs of Colon26 tumor-bearing mice after i.v. injection of AUN at Day 5, Day 7, and Day 10. N.A.: Tumors were completely disappeared by bacterial treatment. B) Images of bacterial colony of AUN from extracted organs of Colon26 tumor-bearing mice after i.v. injection of AUN at Day 5, Day 7, and Day 10. Black arrows represent bacterial colonies of AUN.

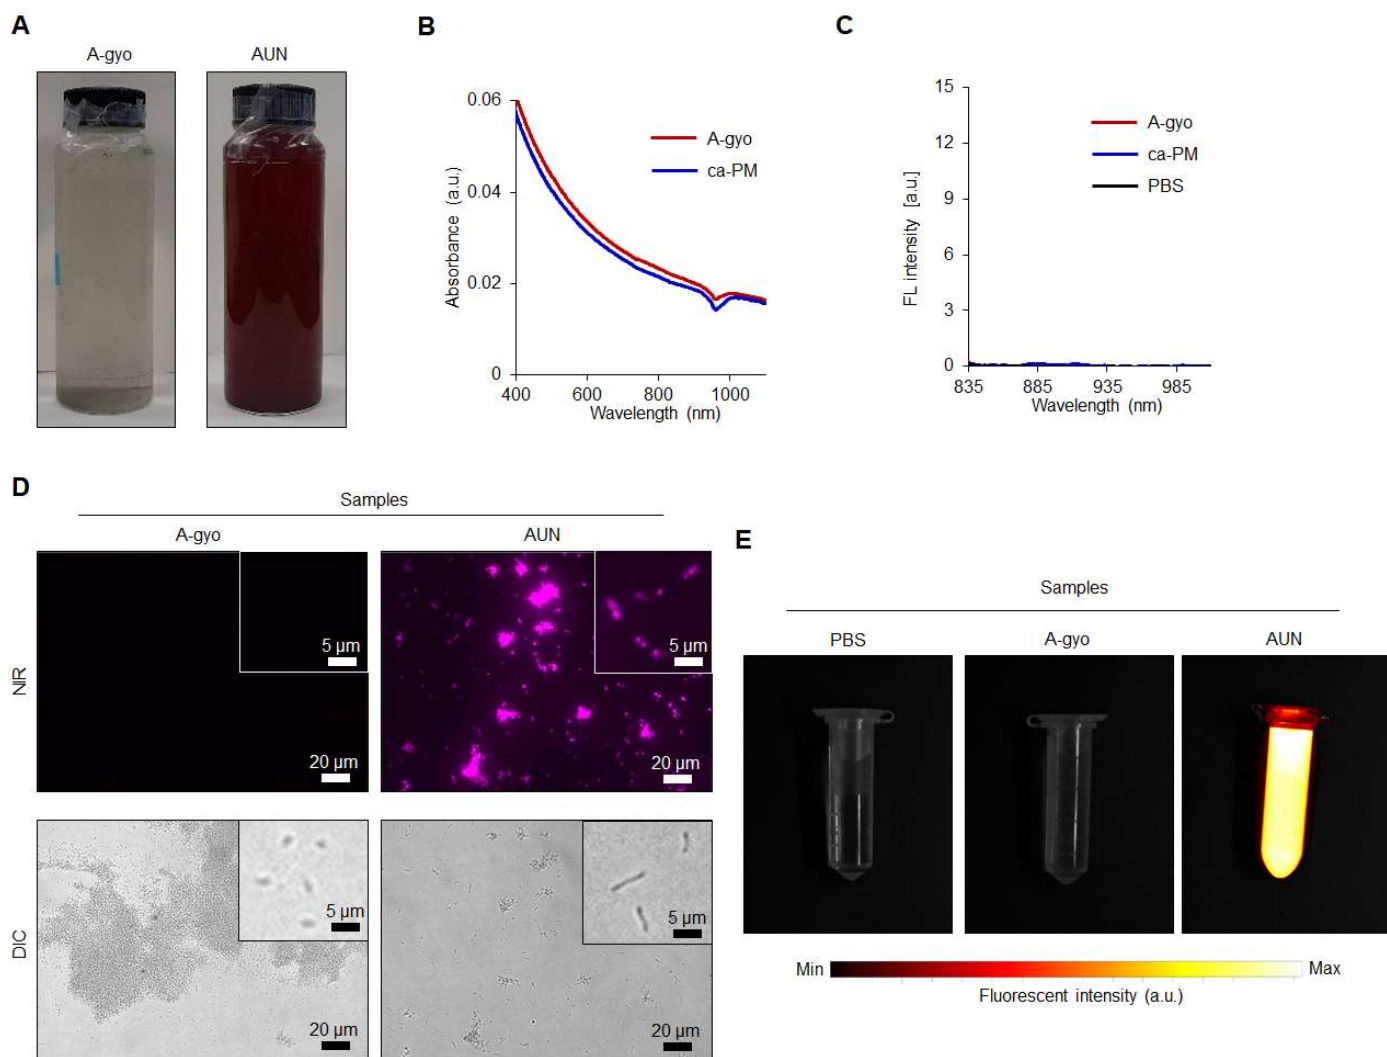

**Figure S7.** Optical properties of functional bacteria. (A) Images of A-gyo (left) and AUN (right) dispersions. (B) UV–Vis–NIR absorbance spectra of i-PM and ca-PM. (C) Fluorescent emission spectra of A-gyo, ca-PM, and PBS excited at 805 nm. (D) *In vitro* NIR fluorescent and differential interference contrast (DIC) imaging of A-gyo and AUN. The bacterial concentration is  $5 \times 10^8$  CFU mL<sup>-1</sup>. Upper-right inset of fluorescent/DIC images is the magnified A-gyo and AUN. The bacteria display a pink fluorescence. (E) NIR FL images of PBS, A-gyo, and AUN dispersions.



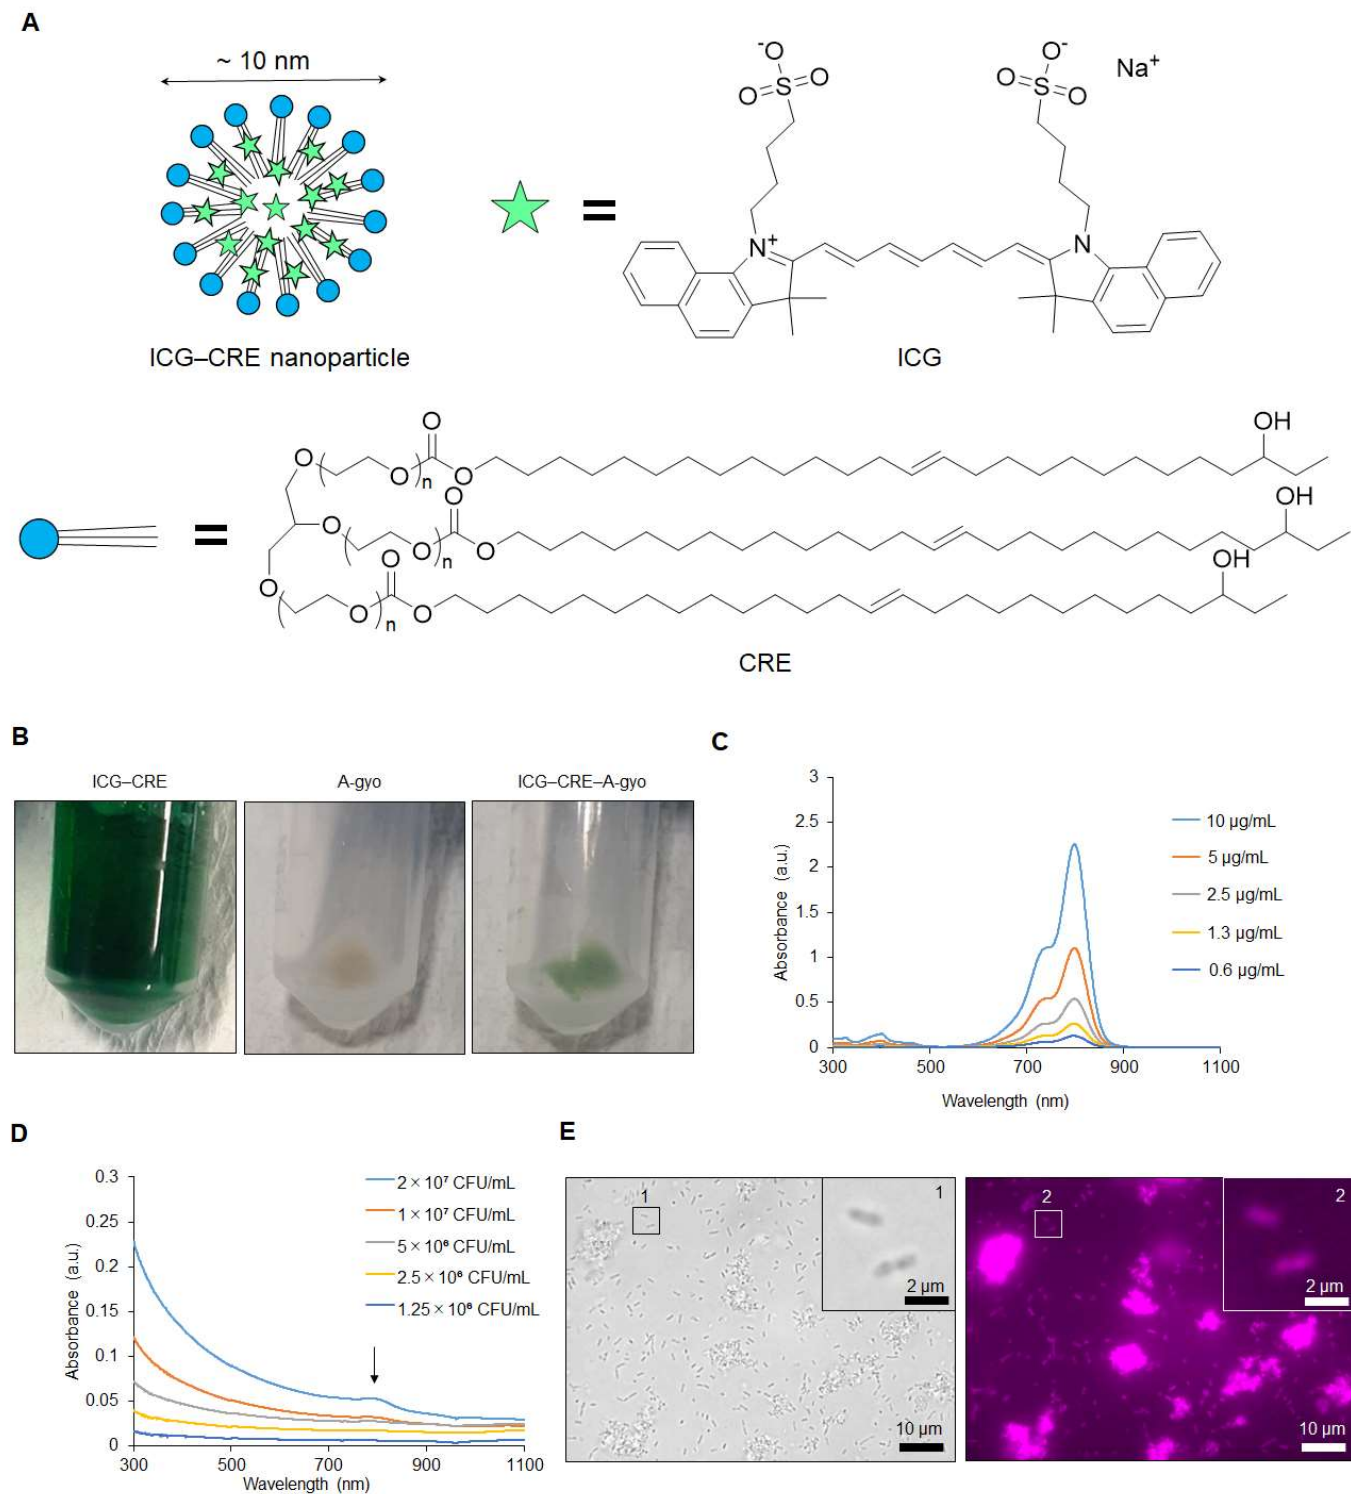

**Figure S8.** Optical properties of ICG-CRE-A-gyo. A) Schematic illustration of ICG-CRE nanoparticles. B) Images of ICG-CRE dispersion (left), A-gyo (middle), and ICG-CRE-A-gyo (right) pellets. C) UV-Vis-NIR absorbance of ICG-CRE dispersions at different concentration. D) UV-vis-NIR absorbance spectra of ICG-CRE-A-gyo dispersions at different concentrations. The black arrow displays a characteristic peak from an ICG molecule around 800 nm. E) DIC and NIR fluorescent imaging of the prepared ICG-CRE-A-gyo. The numbers (1 and 2) represent the location for magnified images of bacteria.

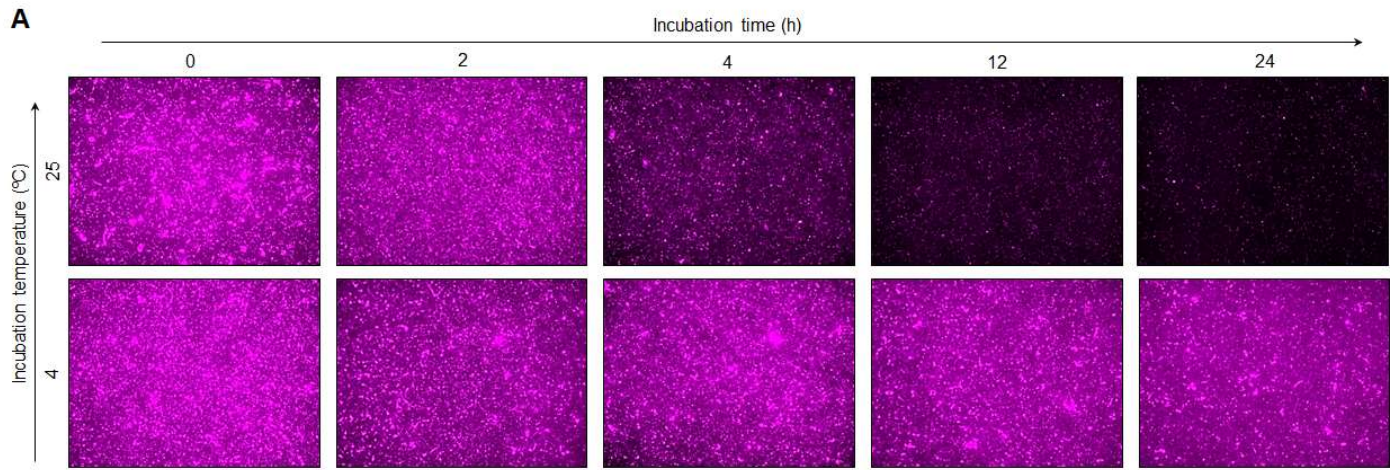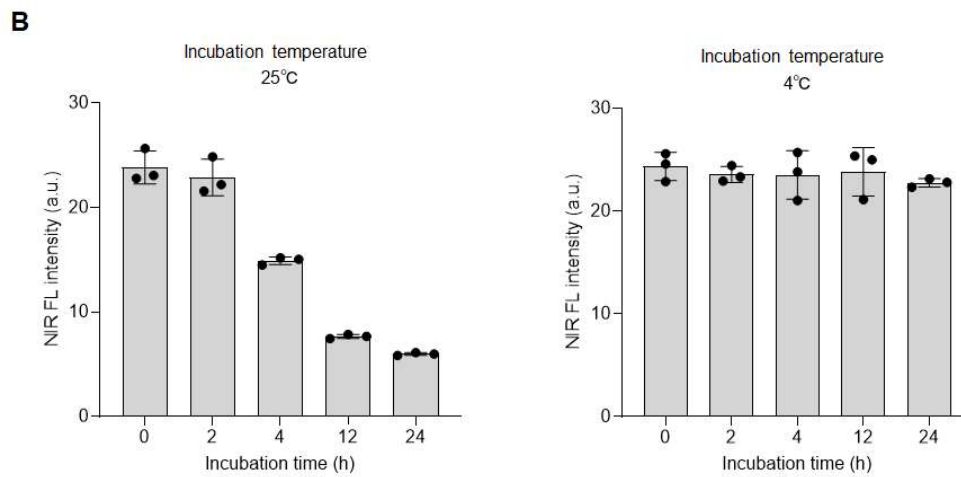

**Figure S9.** A) NIR FL images and B) NIR FL intensity of ICG–CRE–A-gyo after incubation in PBS buffer for 2, 4, 12, and 24 h at 25 °C and 4 °C, respectively. Bacterial concentration is  $2.7 \times 10^8$  CFU mL<sup>-1</sup>. Data are represented as mean  $\pm$  SEM; n = 3 independent areas (region of interest) in each bacterial solution after incubation for 2, 4, 12, and 24 h at 25 °C and 4 °C, respectively.

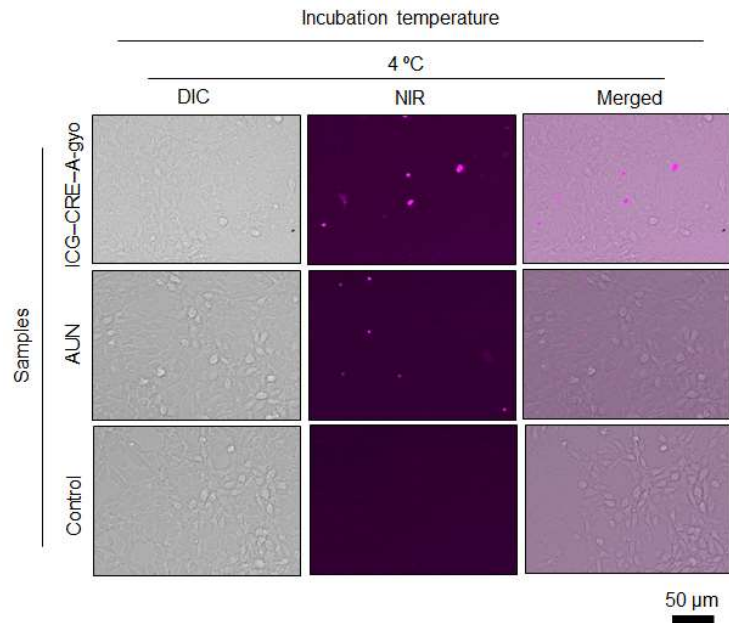

**Figure S10.** FL images of live Colon-26 cells after treatment with ICG-CRE-A-gyo and AUN for 4 h at 4 °C. The bacteria display a pink fluorescence.

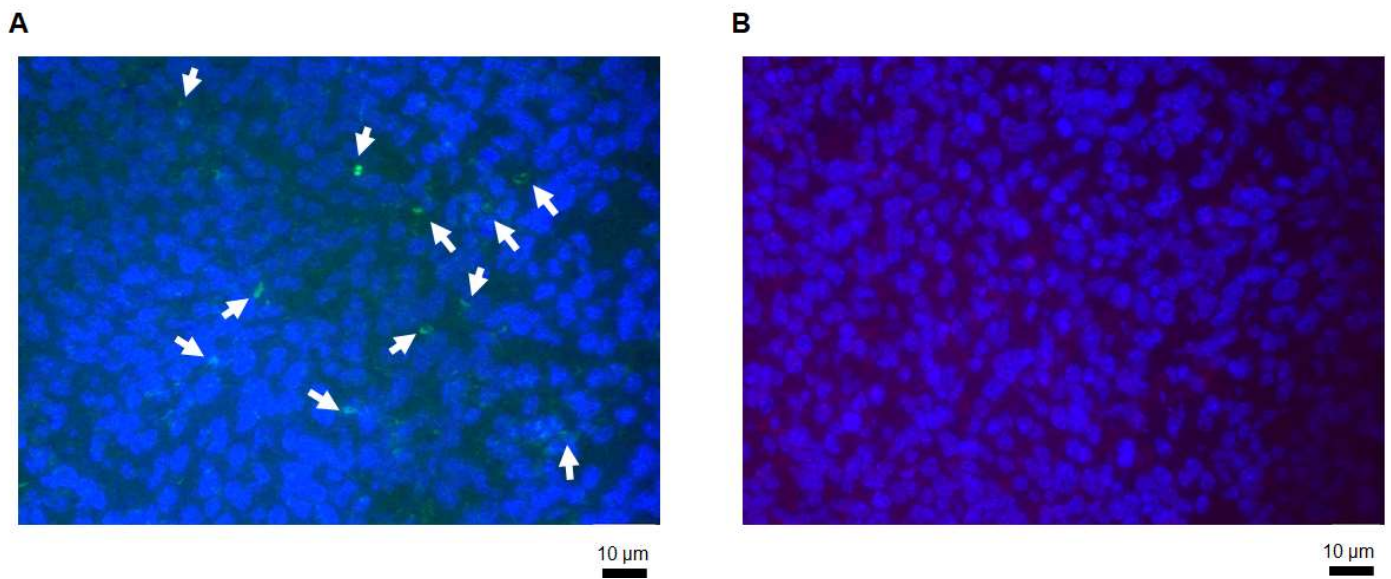

**Figure S11.** Observation of bacterial distribution in solid tumor tissue using FISH analysis. Bacterial cells and colonies of A) PM and B) RP are colored green and red, respectively. Cancer cells (blue) were counterstained with 4',6-diamidino-2-phenylindole (DAPI). White arrows represent tumor-resident PM colonies.



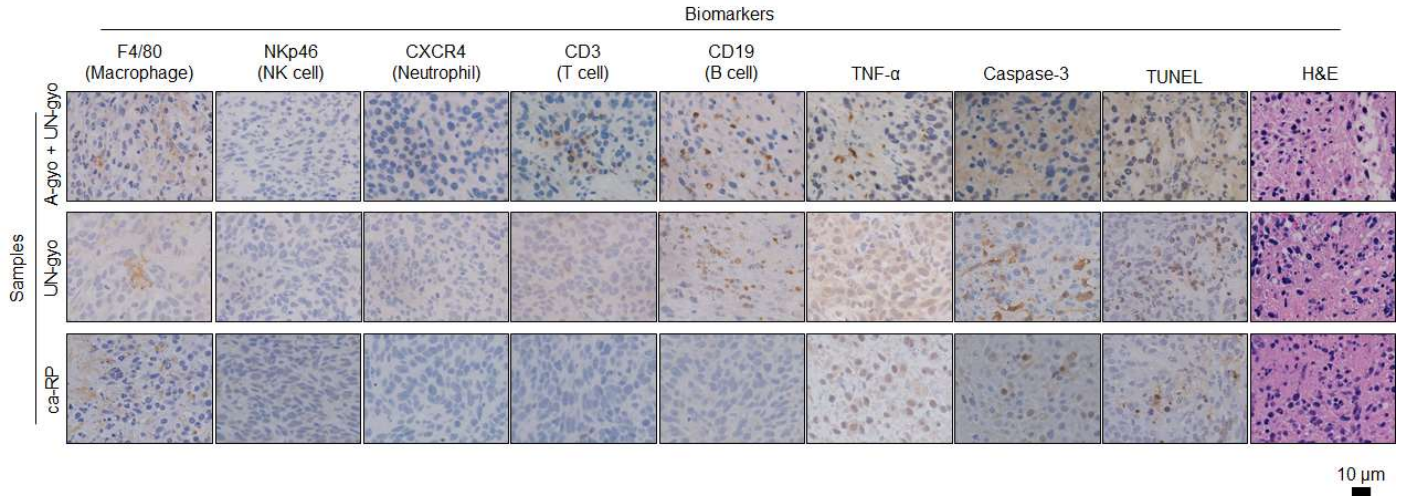

**Figure S12.** IHC (F4/80, NKp46, CXCR4, CD3, CD19, TNF- $\alpha$ , and caspase-3), TUNEL, and H&E stained tumor tissues collected from the groups of mice on day 1 after treatments with ca-RP, UN-gyo, and A-gyo + UN-gyo.

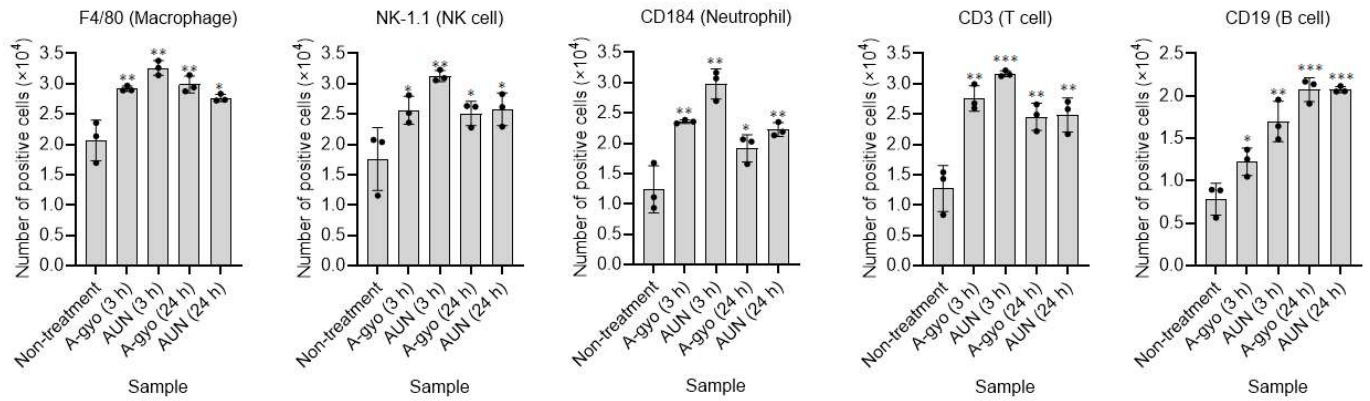

**Figure S13.** Flow cytometry analyses of expression of various immune cells in tumors at different time points (3 and 24 h) after i.v. injection of each sample. Data are represented as mean  $\pm$  SEM;  $n = 3$  independent tumor tissues. Statistical significance was calculated in comparison with the non-treatment group. \*,  $p < 0.05$ , \*\*,  $p < 0.01$ , and \*\*\*,  $p < 0.001$ , by Student's  $t$  one-sided test.

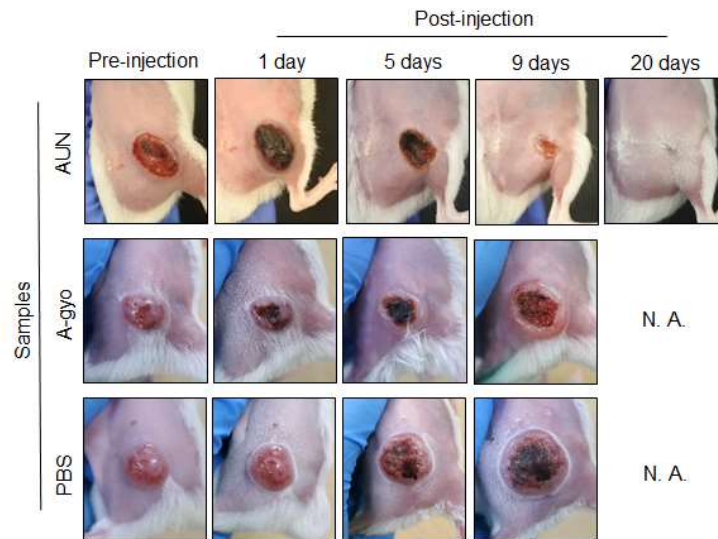

**Figure S14.** *In vivo* antitumor efficacy of functional bacteria against drug-resistant cancer model. Images of lungs after each treatment.

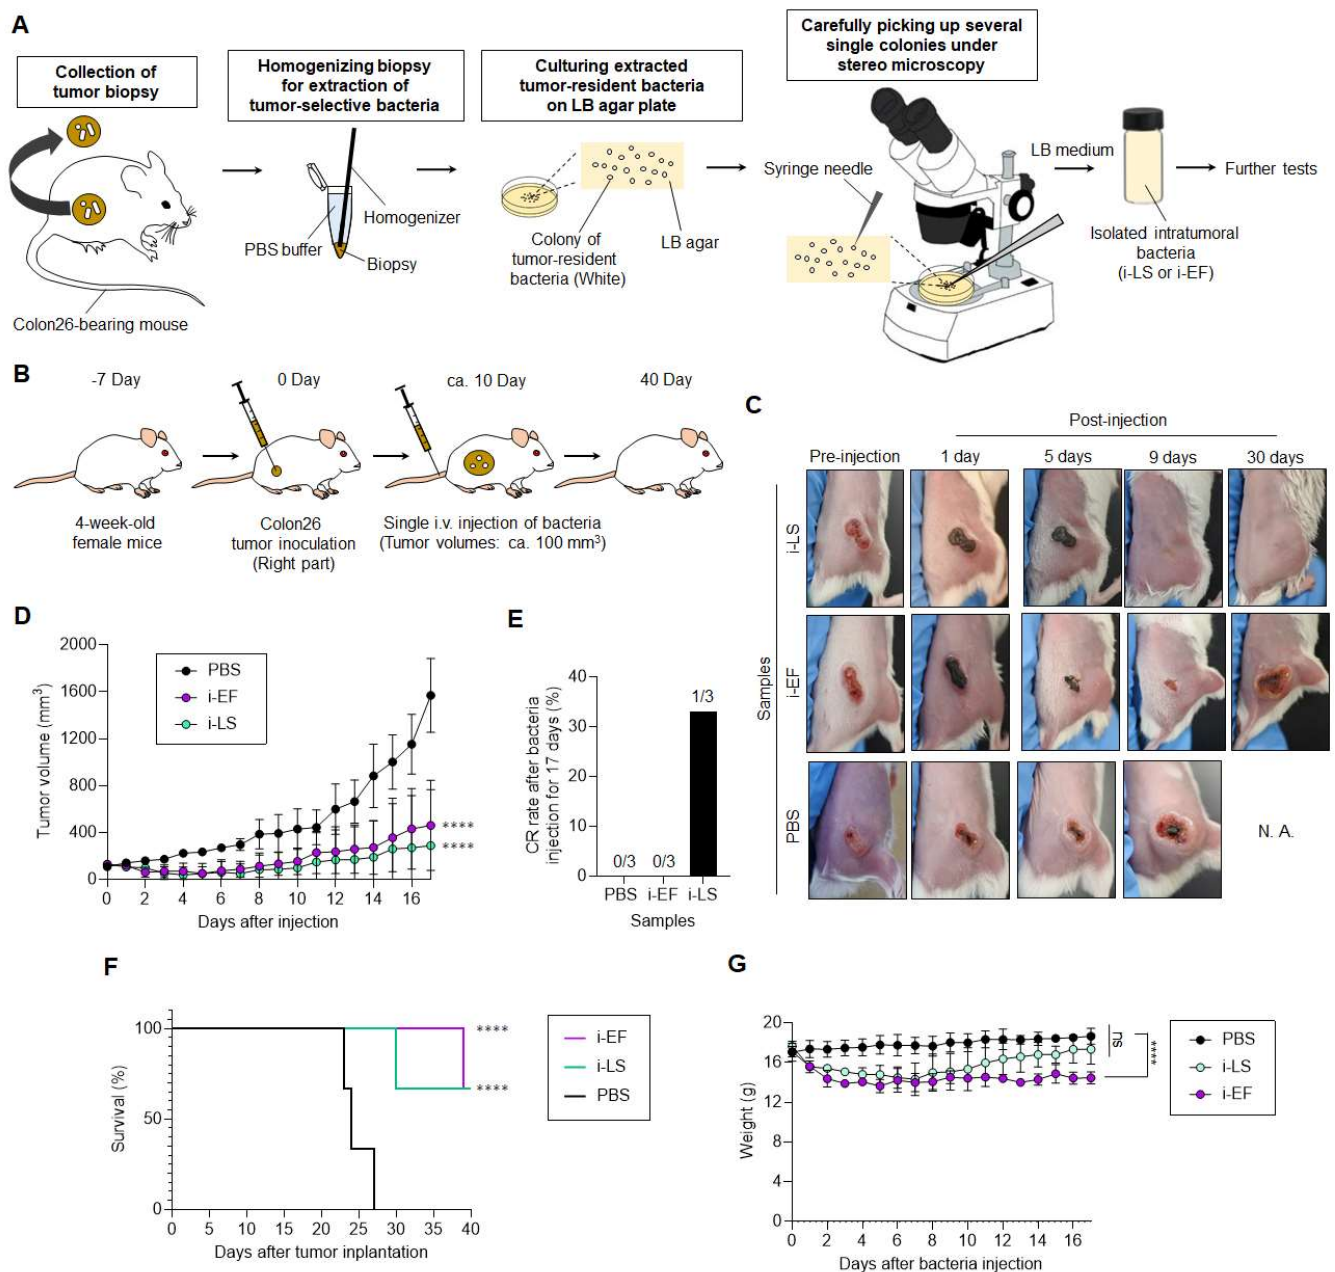

**Figure S15.** *In vivo* antitumor efficacy of various intratumoral bacteria. A) Schematic illustration of isolations of i-LS and i-EF from solid tumors. B) Schematic illustration of *in vivo* Colon-26 carcinoma antitumor tests using i-LS and i-EF. C) Images of mice after each treatment. D) *In vivo* anticancer effect of i-LS and i-EF. The PBS or bacterial suspension was intravenously injected into Colon26-bearing mice. Data are represented as mean  $\pm$  SEM;  $n = 3$  biologically independent mice. Statistical significance was calculated in comparison with the PBS group. \*\*\*\*,  $p < 0.0001$ . E) The CR rate of Colon-26-bearing mice ( $n = 3$  biologically independent mice) after the injection of bacteria or PBS for 17 days. F) Kaplan–Meier survival curves of Colon26-bearing mice ( $n = 3$  biologically independent mice) after tumor implantation for 40 days. Statistical significance was calculated in comparison with the PBS group. \*\*\*\*,  $p < 0.0001$ , Log-rank (Mantel-Cox) test. G) Weight of mice after each treatment. Data are represented as mean  $\pm$  SEM;  $n = 3$  independent experiments. ns, not significant. \*\*\*\*,  $p < 0.0001$ , by two-way ANOVA test.



**Table S1.** Obtained 16S rRNA gene sequences of *A-gyo*.

<Partial gene sequence (758 bp)>

```
GATTGAACGCTGGCGGCAGGCCTAACACATGCAAGTCGAGCGGTAACAGGrGAAAGCT
TGCTTTCTTGCTGACGAGCGGCGGACGGGTGAGTAATGTATGGGGATCTGCCCGATAG
AGGGGGATAACTACTGGAAACGGTGGCTAATACCGCATAATGTCTACGGACCAAAGCA
GGGGCTCTTCGGACCTTGCACTATCGGATGAACCCATATGGGATTAGCTAGTAGGTGG
GGTAAAGGCTCACCTAGGCGACGATCTCTAGCTGGTCTGAGAGGATGATCAGCCACAC
TGGGACTGAGACACGGCCCAGACTCCTACGGGAGGCAGCAGTGGGGAATATTGCACA
ATGGGCGCAAGCCTGATGCAGCCATGCCGCGTGTATGAAGAAGGCCTTAGGGTTGTAA
AGTACTTTCAGCGGGGAGGAAGGTGATAAGGTTAATACCCTTrTCAATTGACGTTACCC
GCAGAAGAAGCACCGGCTAACTCCGTGCCAGCAGCCGCGGTAATACGGAGGGTGCAA
GCGTTAATCGGAATTACTGGGCGTAAAGCGCACGCAGGCGGTCAATTAAGTCAGATGT
GAAAGCCCCGAGCTTAACTTGGGAATTGCATCTGAAACTGGTTGGCTAGAGTCTTGTA
GAGGGGGGTAGAATTCCATGTGTAGCGGTGAAATGCGTAGAGATGTGGAGGAATACC
GGTGGCGAAGGCGGCCCCCTGGACAAAGACTGACGCTCAGGTGCGAAAGCGTGGGGA
GCAAACA
```

<Complete gene sequence (1,466 bp)>

```
ATTGAACGCTGGCGGCAGGCCTAACACATGCAAGTCGAGCGGTAACAGGrAGAAAGCT
TGCTTTCTTGCTGACGAGCGGCGGACGGGTGAGTAATGTATGGGGATCTGCCCGATAG
AGGGGGATAACTACTGGAAACGGTGGCTAATACCGCATAATGTCTACGGACCAAAGCA
GGGGCTCTTCGGACCTTGCACTATCGGATGAACCCATATGGGATTAGCTAGTAGGTGG
GGTAAAGGCTCACCTAGGCGACGATCTCTAGCTGGTCTGAGAGGATGATCAGCCACAC
TGGGACTGAGACACGGCCCAGACTCCTACGGGAGGCAGCAGTGGGGAATATTGCACA
ATGGGCGCAAGCCTGATGCAGCCATGCCGCGTGTATGAAGAAGGCCTTAGGGTTGTAA
AGTACTTTCAGCGGGGAGGAAGGTGATAAGGTTAATACCCTTrTCAATTGACGTTACCC
GCAGAAGAAGCACCGGCTAACTCCGTGCCAGCAGCCGCGGTAATACGGAGGGTGCAA
GCGTTAATCGGAATTACTGGGCGTAAAGCGCACGCAGGCGGTCAATTAAGTCAGATGT
GAAAGCCCCGAGCTTAACTTGGGAATTGCATCTGAAACTGGTTGGCTAGAGTCTTGTA
GAGGGGGGTAGAATTCCATGTGTAGCGGTGAAATGCGTAGAGATGTGGAGGAATACC
GGTGGCGAAGGCGGCCCCCTGGACAAAGACTGACGCTCAGGTGCGAAAGCGTGGGGA
GCAAACAGGATTAGATAACCCTGGTAGTCCACGCTGTAAACGATGTCGATTTAGAGGTT
GTGGTCTTGAACCGTGGCTTCTGGAGCTAACGCGTTAAATCGACCGCCTGGGGAGTAC
GGCCGCAAGGTTAAAACCTCAAATGAATTGACGGGGGCCCGCACAAAGCGGTGGAGCAT
GTGGTTTAATTCGATGCAACGCGAAGAACCTTACCTACTCTTGACATCCAGCGAATCCT
TTAGAGATAGAGGAGTGCCTTCGGGAACGCTGAGACAGGTGCTGCATGGCTGTCGTCA
GCTCGTGTGTGAAATGTTGGGTTAAGTCCCGCAACGAGCGCAACCCTTATCCTTTGTT
GCCAGCACGrATGGTGGGAACTCAAAGGAGACTGCCGGTGATAAACCGGAGGAAGGT
GGGGATGACGTCAAGTCATCATGGCCCTTACGAGTAGGGCTACACACGTGCTACAATG
GCAGATACAAAGAGAAGCGACCTCGCGAGAGCAAGCGGAACTCATAAAGTCTGTCGT
AGTCCGGATTGGAGTCTGCAACTCGACTCCATGAAGTCGGAATCGCTAGTAATCGTAG
ATCAGAATGCTACGGTGAATACGTTCCCGGGCCTTGTACACACCGCCCGTCACACCATG
GGAGTGGGTTGCAAAAGAAGTAGGTAGCTTAACTTCGGGAGGGCGCTTACCACCTTG
TGATTCATGACTGGGGTG
```

**Table S2.** Obtained 16S rRNA gene sequences of UN-gyo.

<Partial gene sequence (703 bp)>

```
GAGCGAACGCTGGCGGCAGGCTTAACACATGCAAGTCGAACGGGGCGTAGCAATACGTC
AGTGGCAGACGGGTGAGTAACGCGTGGGAACGTACCTTTTGGTTCGGAACAACACAGG
GAAACTTGTGCTAATACCGGATAAGCCCTTACGGGGAAAGATTTATCGCCGAAAGATC
GGCCCGCGTCTGATTAGCTAGTTGGTGAGGTAATGGCTCACCAAGGCGACGATCAGTA
GCTGGTCTGAGAGGATGATCAGCCACATTGGGACTGAGACACGGCCCAAACCTCCTACG
GGAGGCAGCAGTGGGGAATATTGGACAATGGGGGAAACCCTGATCCAGCCATGCCGC
GTGAGTGATGAAGGCCCTAGGGTTGTAAAGCTCTTTTGTGCGGGAAGATAATGACGGT
ACCGCAAGAATAAGCCCCGGCTAACTTCGTGCCAGCAGCCGCGGTAATACGAAGGGGG
CTAGCGTTGCTCGGAATCACTGGGCGTAAAGGGTGCCTAGGCGGGTTTCTAAGTCAGA
GGTCAAAGCCTGGAGCTCAACTCCAGAACTGCCTTTGATACTGGAAGTCTTGAGTATG
GCAGAGGTGAGTGGAAGTGCAGAGTGTAGAGGTGAAATTCGTAGATATTCGCAAGAACA
CCAGTGGCGAAGGCGGCTCACTGGGCCATTACTGACGCTGAGGCACGAAAGCGTGGGG
AGCAAACA
```

<Complete gene sequence (1,411 bp)>

```
AGCGAACGCTGGCGGCAGGCTTAACACATGCAAGTCGAACGGGGCGTAGCAATACGTC
GTGGCAGACGGGTGAGTAACGCGTGGGAACGTACCTTTTGGTTCGGAACAACACAGGG
AAACTTGTGCTAATACCGGATAAGCCCTTACGGGGAAAGATTTATCGCCGAAAGATCG
GCCCGCGTCTGATTAGCTAGTTGGTGAGGTAATGGCTCACCAAGGCGACGATCAGTAG
CTGGTCTGAGAGGATGATCAGCCACATTGGGACTGAGACACGGCCCAAACCTCCTACGG
GAGGCAGCAGTGGGGAATATTGGACAATGGGGGAAACCCTGATCCAGCCATGCCGCGT
GAGTGATGAAGGCCCTAGGGTTGTAAAGCTCTTTTGTGCGGGAAGATAATGACGGTAC
CGCAAGAATAAGCCCCGGCTAACTTCGTGCCAGCAGCCGCGGTAATACGAAGGGGGCT
AGCGTTGCTCGGAATCACTGGGCGTAAAGGGTGCCTAGGCGGGTTTCTAAGTCAGAGG
TGAAAGCCTGGAGCTCAACTCCAGAACTGCCTTTGATACTGGAAGTCTTGAGTATGGC
AGAGGTGAGTGGAAGTGCAGAGTGTAGAGGTGAAATTCGTAGATATTCGCAAGAACACC
AGTGGCGAAGGCGGCTCACTGGGCCATTACTGACGCTGAGGCACGAAAGCGTGGGGA
GCAAACAGGATTAGATACCCTGGTAGTCCACGCCGTAAACGATGAATGCCAGCCGTTA
GTGGGTTTACTCACTAGTGGCGCAGCTAACGCTTTAAGCATTCCGCCTGGGGAGTACGG
TCGCAAGATTA AAACTCAAAGGAATTGACGGGGGCCCGCACAAGCGGTGGAGCATGT
GGTTTAATTCGACGCAACGCGCAGAACCTTACCAGCCCTTGACATGTCCAGGACCGGT
CGCAGAGACGCGACCTTCTCTTCGGAGCCTGGAGCACAGGTGCTGCATGGCTGTCTGC
AGCTCGTGTCTGAGATGTTGGGTTAAGTCCCGCAACGAGCGCAACCCCCGTCCTTAGT
TGCTACCATTTAGTTGAGCACTCTAAGGAGACTGCCGGTGATAAGCCGCGAGGAAGGT
GGGGATGACGTCAAGTCTCATGGCCCTTACGGGCTGGGCTACACACGTGCTACAATG
GCGGTGACAATGGGAAGCTAAGGGGCGACCCTTCGCAAATCTCAAAAAGCCGTCTCAG
TTCGGATTGGGCTCTGCAACTCGAGCCCATGAAGTTGGAATCGCTAGTAATCGTGGATC
AGCATGCCACGGTGAATACGTTCCCGGGCCTGTACACACCGCCCGTACACCATGGG
AGTTGGCTTTACCTGAAGACGGTGCCTAACAGCAATGGGGGCAGCCGGCCACGGTA
GGGTCAGCGACTGGGGTG
```

**Table S3.** CBCs and biochemical parameters of the mice injected with PBS or AUN dispersion after 30 days.

| Measured value         | Entry | Unit                           | PBS (n = 5)          | AUN (n = 5)          | P value  |
|------------------------|-------|--------------------------------|----------------------|----------------------|----------|
| CBC                    | WBC   | $\times 10^2 \mu\text{L}^{-1}$ | $56.00 \pm 7.07$     | $56.33 \pm 7.57$     | $> 0.05$ |
|                        | RBC   | $\times 10^4 \mu\text{L}^{-1}$ | $865.80 \pm 19.25$   | $876.20 \pm 50.79$   | $> 0.05$ |
|                        | HGB   | $\text{g dL}^{-1}$             | $12.58 \pm 0.37$     | $12.66 \pm 0.81$     | $> 0.05$ |
|                        | HCT   | %                              | $40.74 \pm 0.79$     | $40.82 \pm 2.40$     | $> 0.05$ |
|                        | MCV   | fL                             | $47.08 \pm 0.71$     | $46.58 \pm 0.53$     | $> 0.05$ |
|                        | MCH   | pg                             | $14.52 \pm 0.26$     | $14.44 \pm 0.15$     | $> 0.05$ |
|                        | MCHC  | $\text{g dL}^{-1}$             | $30.09 \pm 0.49$     | $31.00 \pm 0.33$     | $> 0.05$ |
|                        | PLT   | $\times 10^4 \mu\text{L}^{-1}$ | $67.46 \pm 4.97$     | $68.10 \pm 5.05$     | $> 0.05$ |
| Biochemical parameters | TP    | $\text{g dL}^{-1}$             | $4.10 \pm 0.13$      | $4.00 \pm 0.18$      | $> 0.05$ |
|                        | ALB   | $\text{g dL}^{-1}$             | $2.90 \pm 0.09$      | $2.70 \pm 0.13$      | $> 0.05$ |
|                        | BUN   | $\text{mg dL}^{-1}$            | $21.02 \pm 3.61$     | $21.94 \pm 2.77$     | $> 0.05$ |
|                        | CRE   | $\text{mg dL}^{-1}$            | $0.10 \pm 0.01$      | $0.10 \pm 0.01$      | $> 0.05$ |
|                        | Na    | $\text{mEq L}^{-1}$            | $151.40 \pm 1.34$    | $152.40 \pm 1.52$    | $> 0.05$ |
|                        | K     | $\text{mEq L}^{-1}$            | $3.38 \pm 0.28$      | $3.14 \pm 0.36$      | $> 0.05$ |
|                        | Cl    | $\text{mEq L}^{-1}$            | $118.20 \pm 1.10$    | $118.80 \pm 0.84$    | $> 0.05$ |
|                        | AST   | $\text{IU L}^{-1}$             | $64.00 \pm 8.49$     | $67.60 \pm 11.37$    | $> 0.05$ |
|                        | ALT   | $\text{IU L}^{-1}$             | $34.50 \pm 4.95$     | $35.40 \pm 3.98$     | $> 0.05$ |
|                        | LDH   | $\text{IU L}^{-1}$             | $284.25 \pm 60.32$   | $264.80 \pm 56.14$   | $> 0.05$ |
|                        | AMY   | $\text{IU L}^{-1}$             | $1806.00 \pm 157.14$ | $1853.20 \pm 193.67$ | $> 0.05$ |
|                        | CK    | $\text{IU L}^{-1}$             | $211.50 \pm 50.35$   | $205.67 \pm 71.46$   | $> 0.05$ |

Data are represented as the mean  $\pm$  SEM; n = 5 biologically independent mice. Statistical analyses were performed using the Student's two-sided t-test.

Abbreviations: ALB, albumin; ALT, alanine transaminase; AMY, amylase; AST, aspartate aminotransferase; BUN, blood urea nitrogen; Cl, chlorine; CK, creatine kinase; CRE, creatinine; CRP, C-reactive protein; HCT, hematocrit; HGB, hemoglobin; K, potassium; LDH, lactate dehydrogenase; MCH, mean corpuscular hemoglobin; MCHC, mean corpuscular hemoglobin concentration; MCV, mean corpuscular volume; Na, sodium; PLT, platelet; RBC, red blood cell; TP, total protein; WBC, white blood cell.

**Table S4.** CBCs and biochemical parameters of the mice injected with PBS or A-gyo dispersion after 30 days.

| Measured value         | Entry | Unit                           | PBS (n = 5)        | A-gyo (n = 5)       | P value |
|------------------------|-------|--------------------------------|--------------------|---------------------|---------|
| CBC                    | WBC   | $\times 10^2 \mu\text{L}^{-1}$ | 66.2 $\pm$ 12.70   | 66.8 $\pm$ 12.13    | > 0.05  |
|                        | RBC   | $\times 10^4 \mu\text{L}^{-1}$ | 948.8 $\pm$ 8.70   | 883.8 $\pm$ 31.58   | > 0.05  |
|                        | HGB   | g dL <sup>-1</sup>             | 14.1 $\pm$ 0.31    | 13.88 $\pm$ 0.46    | > 0.05  |
|                        | HCT   | %                              | 44.7 $\pm$ 0.91    | 40.98 $\pm$ 1.67    | > 0.05  |
|                        | MCV   | fL                             | 47.1 $\pm$ 0.81    | 46.38 $\pm$ 0.27    | > 0.05  |
|                        | MCH   | pg                             | 14.8 $\pm$ 0.19    | 15.7 $\pm$ 0.12     | > 0.05  |
|                        | MCHC  | g dL <sup>-1</sup>             | 31.5 $\pm$ 0.40    | 33.84 $\pm$ 0.24    | > 0.05  |
|                        | PLT   | $\times 10^4 \mu\text{L}^{-1}$ | 72.6 $\pm$ 4.67    | 70.76 $\pm$ 6.38    | > 0.05  |
| Biochemical parameters | TP    | g dL <sup>-1</sup>             | 4.1 $\pm$ 0.15     | 3.9 $\pm$ 0.16      | > 0.05  |
|                        | ALB   | g dL <sup>-1</sup>             | 2.7 $\pm$ 0.15     | 2.6 $\pm$ 0.06      | > 0.05  |
|                        | BUN   | mg dL <sup>-1</sup>            | 21.5 $\pm$ 2.04    | 22.0 $\pm$ 1.85     | > 0.05  |
|                        | CRE   | mg dL <sup>-1</sup>            | 0.13 $\pm$ 0.01    | 0.12 $\pm$ 0.03     | > 0.05  |
|                        | Na    | mEq L <sup>-1</sup>            | 153.0 $\pm$ 1.14   | 151.0 $\pm$ 0.55    | > 0.05  |
|                        | K     | mEq L <sup>-1</sup>            | 3.6 $\pm$ 0.42     | 3.6 $\pm$ 0.14      | > 0.05  |
|                        | Cl    | mEq L <sup>-1</sup>            | 117.2 $\pm$ 0.45   | 117.8 $\pm$ 1.30    | > 0.05  |
|                        | AST   | IU L <sup>-1</sup>             | 51.4 $\pm$ 6.43    | 58.8 $\pm$ 10.43    | > 0.05  |
|                        | ALT   | IU L <sup>-1</sup>             | 33.2 $\pm$ 7.36    | 34.6 $\pm$ 6.58     | > 0.05  |
|                        | LDH   | IU L <sup>-1</sup>             | 244.2 $\pm$ 75.88  | 254.6 $\pm$ 68.68   | > 0.05  |
|                        | AMY   | IU L <sup>-1</sup>             | 1671.4 $\pm$ 97.66 | 1682.8 $\pm$ 131.58 | > 0.05  |
|                        | CK    | IU L <sup>-1</sup>             | 181.6 $\pm$ 113.95 | 182.6 $\pm$ 128.41  | > 0.05  |

Data are represented as the mean  $\pm$  SEM; n = 5 biologically independent mice. Statistical analyses were performed using the Student's two-sided t-test.

Abbreviations: ALB, albumin; ALT, alanine transaminase; AMY, amylase; AST, aspartate aminotransferase; BUN, blood urea nitrogen; Cl, chlorine; CK, creatine kinase; CRE, creatinine; CRP, C-reactive protein; HCT, hematocrit; HGB, hemoglobin; K, potassium; LDH, lactate dehydrogenase; MCH, mean corpuscular hemoglobin; MCHC, mean corpuscular hemoglobin concentration; MCV, mean corpuscular volume; Na, sodium; PLT, platelet; RBC, red blood cell; TP, total protein; WBC, white blood cell.

**Table S5.** Obtained 16S rRNA gene sequences of i-LS.

<Partial gene sequence (764 bp)>

GGACGAACGCTGGCGGCGTGCCTAATACATGCAAGTCGAGCGACGAATCGAGGTA  
GTACCAAGACGAAGAGCGGCGAACGGGTGAGTAACGCGTGGGAAATCTGCCGAGTAG  
CGGGGACAACGTTTGGAAACGAACGCTAATACCGCATAACAATTGGAATCGCATGAT  
TCTTATTTAAAAGAAGCAAAAGCTTCACTACTTGATGATCCCGCGTTGTATTAGCTAGT  
TGGTAGTGTAAGGACTACCAAGGCGATGATACATAGCCGGCCTGAGAGGGTGAACG  
GCCACACTGGGACTGAGACACGGCCCAGACTCCTACGGGAGGCAGCAGTAGGGAATCT  
TCGGCAATGGACGAAAGTCTGACCGAGCAACGCCGCGTGAGTGAAGAAGGTTTTTCGGA  
TCGTAAAACTCTGTTGTTAGAGAAGAACGTTAAGTAGAGTGGAAAGTTACTTAAGTGA  
CGGTATCTAACCAGAAAGGGACGGCTAACTACGTGCCAGCAGCCGCGGTAATACGTAG  
GTCCCGAGCGTTGTCCGGATTTATTGGGCGTAAAGCGAGCGCAGGTGGTTTTCTAAGTC  
TGATGTAAAAGGCAGTGGCTCAACCATTGTGTGCATTGGAAACTGGGGA  
CAGGAGAGGGGAGTGAATTCCATGTGTAGCGGTGAAATGCGTAGATATATGGAGGA  
ACACCGGAGGCGAAAGCGGCTCTCTGGCCTGTA  
ACTGACACTGAGGCTCGAAAGCGTG  
GGGAGCAAACA

<Complete gene sequence (1,469 bp)>

GACGAACGCTGGCGGCGTGCCTAATACATGCAAGTCGAGCGACGAATCGAGGTA  
TACCAAGACGAAGAGCGGCGAACGGGTGAGTAACGCGTGGGAAATCTGCCGAGTAGC  
GGGGGACAACGTTTGGAAACGAACGCTAATACCGCATAACAATTGGAATCGCATGATT  
CTTATTTAAAAGAAGCAAAAGCTTCACTACTTGATGATCCCGCGTTGTATTAGCTAGT  
GGTAGTGTAAGGACTACCAAGGCGATGATACATAGCCGGCCTGAGAGGGTGAACGG  
CCACACTGGGACTGAGACACGGCCCAGACTCCTACGGGAGGCAGCAGTAGGGAATCTT  
CGGCAATGGACGAAAGTCTGACCGAGCAACGCCGCGTGAGTGAAGAAGGTTTTTCGGAT  
CGTA  
AAACTCTGTTGTTAGAGAAGAACGTTAAGTAGAGTGGAAAGTTACTTAAGTGAC  
GGTATCTAACCAGAAAGGGACGGCTAACTACGTGCCAGCAGCCGCGGTAATACGTAGG  
TCCCGAGCGTTGTCCGGATTTATTGGGCGTAAAGCGAGCGCAGGTGGTTTTCTAAGTCT  
GATGTAAAAGGCAGTGGCTCAACCATTGTGTGCATTGGAAACTGGGGA  
ACTTGAGTGC  
AGGAGAGGGGAGTGAATTCCATGTGTAGCGGTGAAATGCGTAGATATATGGAGGAA  
CACCGGAGGCGAAAGCGGCTCTCTGGCCTGTA  
ACTGACACTGAGGCTCGAAAGCGTGG  
GGAGCAAACAGGATTAGATACCCTGGTAGTCCACGCCGTAAACGATGAGTGCTAGCTG  
TAGGGAGCTATAAGTTCTCTGTAGCGCAGCTAACGCATTAAGCACTCCGCCTGGGGAG  
TACGACCGCAAGGTTGAAACTCAAAGGAATTGACGGGGGCCCCGCACAAGCGGTGGAG  
CATGTGGTTTAATTCGAAGCAACGCGAAGAACCCTTACCAGGTCTTGACATCCCGATGC  
AATCCTTAGAGATAAGGAGTTACTTCGGTACATCGGTGACAGGTGGTGCATGGTTGTC  
GTCAGCTCGTGTCGTGAGATGTTGGGTTAAGTCCCGCAACGAGCGCAACCCTTATTACT  
AGTTGCCATCATTAAAGTTGGGCACTCTAGTGAGACTGCCGGTGATAAACC  
GGAGGAAG  
GTGGGGATGACGTCAAATCATCATGCCCTTATGACCTGGGCTACACACGTGCTACAAT  
GGGTGGTACAACGAGTCGCCAACC  
CGCGAGGGTGCCTAATCTCTTAAAACCATTCTC  
AGTTCGGATTGCAGGCTGCAACTCGCCTGCATGAAGTCGGAATCGCTAGTAATCGCGG  
ATCAGCACGCCGCGGTGAATACGTTCCCGGGCCTTGTACACACCGCCCGTCACACCAC  
GGAAGTTGGGAGTACCAAAGTAGGTTGCCTA  
ACCGCAAGGAGGGCGCTTCCTAAGGT  
AAGACCGATGACTGGGGTG

**Table S6.** Obtained 16S rRNA gene sequences of i-EF

<Partial gene sequence (776 bp)>

GGACGAACGCTGGCGGCGTGCCTAATACATGCAAGTCGAACGCTTCTTTCCTCCCGAGT  
GCTTGCACTCATTTGGAAAGAGGAGTGGCGGACGGGTGAGTAACACGTGGGTAACCTA  
CCCATCAGAGGGGGATAAACTTGGAAACAGGTGCTAATACCGCATAACAGTTTATGC  
CGCATGGCATAAGAGTGAAAGGCGCTTTCGGGTGTCCTGATGGATGGACCCGCGGTG  
CATTAGCTAGTTGGTGAGGTAACGGCTCACCAAGGCCACGATGCATAGCCGACCTGAG  
AGGGTGATCGGCCACACTGGGACTGAGACACGGCCCAGACTCCTACGGGAGGCAGCA  
GTAGGGAATCTTCGGCAATGGACGAAAGTCTGACCGAGCAACGCCGCGTGAGTGAAG  
AAGGTTTTTCGGATCGTAAAACCTCTGTTGTTAGAGAAGAACAAGGACGTTAGTAACTGA  
ACGTCCCCTGACGGTATCTAACCAGAAAGCCACGGCTAACTACGTGCCAGCAGCCGCG  
GTAATACGTAGGTGGCAAGCGTTGTCCGGATTTATTGGGCGTAAAGCGAGCGCAGGCG  
GTTTCTTAAGTCTGATGTGAAAGCCCCCGGCTCAACCGGGGAGGGTCATTGGAAACTG  
GGAGACTTGAGTGCAGAAGAGGAGAGTGAATTCATGTGTAGCGGTGAAATGCGTA  
GATATATGGAGGAACACCAGTGGCGAAGGCGGCTCTCTGGTCTGTAACCTGACGCTGAG  
GCTCGAAAGCGTGGGGAGCAAACA

<Complete gene sequence (1,483 bp)>

GACGAACGCTGGCGGCGTGCCTAATACATGCAAGTCGAACGCTTCTTTCCTCCCGAGTG  
CTTGCACTCATTTGGAAAGAGGAGTGGCGGACGGGTGAGTAACACGTGGGTAACCTAC  
CCATCAGAGGGGGATAAACTTGGAAACAGGTGCTAATACCGCATAACAGTTTATGCC  
GCATGGCATAAGAGTGAAAGGCGCTTTCGGGTGTCCTGATGGATGGACCCGCGGTGC  
ATTAGCTAGTTGGTGAGGTAACGGCTCACCAAGGCCACGATGCATAGCCGACCTGAGA  
GGGTGATCGGCCACACTGGGACTGAGACACGGCCCAGACTCCTACGGGAGGCAGCAGT  
AGGGAATCTTCGGCAATGGACGAAAGTCTGACCGAGCAACGCCGCGTGAGTGAAGAA  
GGTTTTTCGGATCGTAAAACCTCTGTTGTTAGAGAAGAACAAGGACGTTAGTAACTGAAC  
GTCCCCTGACGGTATCTAACCAGAAAGCCACGGCTAACTACGTGCCAGCAGCCGCGGT  
AATACGTAGGTGGCAAGCGTTGTCCGGATTTATTGGGCGTAAAGCGAGCGCAGGCGGT  
TTCTTAAGTCTGATGTGAAAGCCCCCGGCTCAACCGGGGAGGGTCATTGGAAACTGGG  
AGACTTGAGTGCAGAAGAGGAGAGTGAATTCATGTGTAGCGGTGAAATGCGTAGAT  
ATATGGAGGAACACCAGTGGCGAAGGCGGCTCTCTGGTCTGTAACCTGACGCTGAGGCT  
CGAAAGCGTGGGGAGCAAACAGGATTAGATACCCTGGTAGTCCACGCCGTAACCGATG  
AGTGCTAAGTGTTGGAGGGTTTCCGCCCTTCAGTGCTGCAGCAAACGCATTAAGCACTC  
CGCCTGGGGAGTACGACCGCAAGGTTGAAACTCAAAGGAATTGACGGGGGCCCGCAC  
AAGCGGTGGAGCATGTGGTTTAATTCGAAGCAACGCGAAGAACCTTACCAGGTCTTGA  
CATCCTTTGACCACTCTAGAGATAGAGCTTTCCTTCGGGGACAAAGTGACAGGTGGTG  
CATGGTTGTCGTCAGCTCGTGTGTCGTGAGATGTTGGGTTAAGTCCCGCAACGAGCGCAAC  
CCTTATTGTTAGTTGCCATCATTTAGTTGGGCACTCTAGCGAGACTGCCGGTGACAAAC  
CGGAGGAAGGTGGGGATGACGTCAAATCATCATGCCCTTATGACCTGGGCTACACAC  
GTGCTACAATGGGAAGTACAACGAGTCGCTAGACCGCGAGGTCATGCAAATCTCTTAA  
AGTTCTCTCAGTTCGGATTGCAGGCTGCAACTCGCCTGCATGAAGCCGGAATCGCTAG  
TAATCGCGGATCAGCACGCCGCGGTGAATACGTTCCCGGGCCTTGTACACACCGCCCCG  
TCACACCACGAGAGTTTGTAAACACCCGAAGTCGGTGAGGTAACCTTTTTGGAGCCAGC  
CGCCTAAGGTGGGATAGATGATTGGGGTG



**Table S7.** Primers used for amplification and sequencing of the 16S rRNA gene of isolated bacteria.

| Object                                        | Primer       | Sequence                                                |
|-----------------------------------------------|--------------|---------------------------------------------------------|
| Primers for analyzing partial gene sequences  | 10F<br>800R  | 5'-GTTTGATCCTGGCTCA-3'<br>5'-TACCAGGGTATCTAATCC-3'      |
| Primers for analyzing complete gene sequences | 27F<br>1492R | 5'-AGAGTTTGATCCTGGCTCAG-3'<br>5'-GGCTACCTTGTTACGACTT-3' |

**Table S8.** Antibodies used in this study.

| Antibody                      | Type              | Source                    | Catalog No. | Application    |
|-------------------------------|-------------------|---------------------------|-------------|----------------|
| CD4                           | Rabbit Monoclonal | Cell Signaling Technology | 25229       | IHC (1:100)    |
| CD8                           | Rabbit Monoclonal | Cell Signaling Technology | 98941       | IHC (1:200)    |
| F4/80                         | Mouse Monoclonal  | BMA Biomedicals           | T-2028      | IHC (1:50)     |
| CD3                           | Rabbit Monoclonal | Abcam                     | ab16669     | IHC (1:100)    |
| CD19                          | Rabbit Polyclonal | Bioss                     | bs-0079R    | IHC (1:100)    |
| CXCR4                         | Goat Polyclonal   | Abcam                     | ab1670      | IHC (1:100)    |
| NKp46                         | Rabbit Polyclonal | Affinity Biosciences      | DF7599      | IHC (1:100)    |
| Caspase-3                     | Rabbit Polyclonal | Cell Signaling Technology | 9661S       | IHC (1:100)    |
| TNF- $\alpha$                 | Rabbit Polyclonal | Abcam                     | ab6671      | IHC (1:100)    |
| Anti-digoxigenin-peroxidase   | Sheep Polyclonal  | Merck Millipore           | S7100       | Tunel          |
| FITC-CD4                      | Rat Monoclonal    | BioLegend                 | 100406      | Flow cytometry |
| FITC-CD8a                     | Rat Monoclonal    | BioLegend                 | 100706      | Flow cytometry |
| FITC-CD45RO                   | Mouse Monoclonal  | BioLegend                 | 304242      | Flow cytometry |
| FITC-F4/80                    | Rat Monoclonal    | BioLegend                 | 123108      | Flow cytometry |
| FITC-CD3                      | Rat Monoclonal    | BioLegend                 | 100204      | Flow cytometry |
| FITC-CD19                     | Rat Monoclonal    | BioLegend                 | 152404      | Flow cytometry |
| Alexa Fluor 488-CD184 (CXCR4) | Rat Monoclonal    | Thermo Fisher Scientific  | 53-9991-80  | Flow cytometry |
| FITC-NK-1.1                   | Mouse Monoclonal  | BioLegend                 | 108706      | Flow cytometry |

**Table S9.** Probes used in microbial FISH analysis.

| <b>Probe name</b> | <b>Accession no.</b> | <b>Specificity</b>       | <b>Source</b>           | <b>Target rRNA</b> | <b>Sequence</b>            |
|-------------------|----------------------|--------------------------|-------------------------|--------------------|----------------------------|
| Rhodopseud        | pB-1634              | <i>Rhodopseudomonas</i>  | Chromosome Science Labo | 16S rRNA           | 5'-GACTTAGAAACCCGCCTACG-3' |
| EUB338            | -                    | <i>Proteus mirabilis</i> | Chromosome Science Labo | 16S rRNA           | 5'-GCCCTGCTTTGGTC-3'       |
